# Supplementary material for: Alanyl-tRNA synthetase genes of Vanderwaltozyma polyspora arose from duplication of a dual-functional predecessor of mitochondrial origin
Source: PubMed Central journal article supplement — Nucleic Acids Res. 2011 Sep 8;40(1):314–22. doi: 10.1093/nar/gkr724 (PMC3245939; doi:10.1093/nar/gkr724), 2011-09-08
Supplement: supp_gkr724_supporting_data.pdf [file supp_gkr724_supporting_data.pdf]

# Sequence alignment of AlARs from various sources

|   |             |                               |    |       |    |                                                         |    |                                                    |                     |                    |
|---|-------------|-------------------------------|----|-------|----|---------------------------------------------------------|----|----------------------------------------------------|---------------------|--------------------|
| 1 | --          | A T N V R N T F L D Y F K     | -- | S K   | -- | E H K F V K S S P V V P F                               | -- | D D P T L L F A N A G M N Q Y                      | K P I F L G T V D P | S. cerevisiae      |
| 1 | --          | A H N V R K T F M D Y F E     | -- | E K   | -- | N H K Y V K S S P V V P F                               | -- | D D P T L L F T N A G M N Q Y                      | K P I F L G T V D P | C. glabrata        |
| 1 | --          | --                            | -- | --    | -- | E H K F V R S S P V V P F                               | -- | D D P T L L F A N A G M N Q Y                      | K P I F L G T V D P | V. polyspora 1     |
| 1 | --          | A A N V R S T F L D Y F K     | -- | S K   | -- | G H T F V P S S P V I P F                               | -- | D D P T L L F A N A G M N Q Y                      | K P I F L G T V D P | K. lactis          |
| 1 | --          | A N K V R D T F Y D Y F K     | -- | S K   | -- | N H T F I S S S P V V P Y                               | -- | D D P T L L F A N A G M N Q F                      | K S I F L G T V D P | V. polyspora 2     |
| 1 | --          | A S K V R S T F L D Y F K     | -- | K Q   | -- | Q H T Y V P S S S V V P H                               | -- | N D P T L L F A N A G M N Q Y                      | K P I F L G T V D P | C. albicans        |
| 1 | --          | A T K V R K T F L D Y F G E   | -- | K R   | -- | A H S F V P S S S V I P Y                               | -- | D D P T L L F A N A G M N Q Y                      | K P I F L G T V D P | Y. lipolytica      |
| 1 | --          | A N E I R R T F L K Y F E     | -- | D H   | -- | G H T I V P S S S S V I P Y                             | -- | D D P T L L F A N A G M N Q F                      | K P I F L G T V D P | S. pombe           |
| 1 | --          | A K E V R N A Y I D F F K     | -- | E Q   | -- | K H I Y V H S S S T I P L                               | -- | D D P T L L F A N A G M N Q F                      | K P I F L G T A D P | D. melanogaster 1  |
| 1 | --          | A S E I R Q R F I D F F K     | -- | R N   | -- | E H T Y V H S S S A T I P L                             | -- | D D P T L L F A N A G M N Q F                      | K P I F L N T I D P | H. sapiens 1       |
| 1 | --          | A K R V R D T Y V D F F R     | -- | G K   | -- | G H K F W P S S P V V P H                               | -- | N D P T L L F A N A G M N Q Y                      | K P I F L G T A D P | A. thaliana        |
| 1 | --          | A R E I R K T F L D H F T V   | -- | N H   | -- | G H K F V R S S P V V P F                               | -- | C D P T V A F V N A G M N Q F                      | K S V F L G T A A A | D. melanogaster 2  |
| 1 | A A K A     | S A V R A A F L N F F R D R   | -- | H     | -- | G H R L V P S A S V R P R                               | -- | G D P S L L F V N A G M N Q F                      | K P I F L G T V D P | H. sapiens 2       |
| 1 | --          | L N E I R S T F L D Y F G     | -- | K A   | -- | D H A V T P S A P L V P Q                               | -- | N D P T L L F V N A G M V P F                      | K N V F T G A E --  | C. crescentus      |
| 1 | --          | T A E I R Q A F L D F F H     | -- | S K   | -- | G H Q V V A S S S L V P H                               | -- | N D P T L L F T N A G M N Q F                      | K D V F L G L D --  | E. coli            |
| 1 | --          | S A E V R K M F L D F F K     | -- | E K   | -- | G H A V E P S A S L V P H                               | -- | E D P S L L W I M S G V A T L                      | K K Y F D G R --    | B. subtilis        |
| 1 | --          | T A E I R E K F L S F F E     | -- | G K   | -- | G H L R L P S F S L I P E                               | -- | D D P S L L F T S A G M A P L                      | K P Y F L G A K P I | T. thermophilus    |
| 1 | --          | K E M V K E F I N F F K E     | -- | H G   | -- | H E P I K R A P V T A R                                 | -- | R W R D D I L L T I A S I A V F                    | Q P W I T K G I --  | M. jannaschii      |
| 1 | --          | E I Q R D K F M E F F A       | -- | E R G | -- | H E P I R R Y P V L A K R                               | -- | R W R D D V F L V G A S I Y N F                    | Q P W V T S G L --  | M. thermotrophicus |
| 1 | --          | L D E M R E Y Y L N M F F     | -- | E R G | -- | H G R I E R Y P V V A R                                 | -- | W R T D I E Y L T I A S I A D F                    | Q P F V T S G V --  | A. fulgidus        |
| 1 | P W S M R R | V W N S F A Q S F T Q T T P A | -- | H T   | -- | I V P R Y P V V A R                                     | -- | W R D D C E F T A A G I C A C Y                    | Q P F C V T G E --  | G. lamblia         |
| 1 | --          | --                            | -- | --    | -- | Q A W L D F K K S M E T N T P V Y T A I K R Y P V V C R | -- | W R S D V D F V A A G I Y C F Q P P F C V T G E -- | S                   | T. vaginalis       |

|    |               |                             |                         |                     |                             |                                                     |                       |    |    |                    |
|----|---------------|-----------------------------|-------------------------|---------------------|-----------------------------|-----------------------------------------------------|-----------------------|----|----|--------------------|
| 54 | A S D F       | F Y T L K R A Y N S Q K C   | I R A G                 | G K H N D           | L E D V G K D S             | Y H H T                                             | F F E M L G N W S F G | D  | -- | S. cerevisiae      |
| 54 | S S D F       | F Y T L K R A Y N S Q K C   | I R A G                 | G K H N D           | L E D V G K D S             | Y H H T                                             | F F E M L G N W S F G | D  | -- | C. glabrata        |
| 51 | S S D F       | F Y T L K R A Y N S Q K C   | I R A G                 | G K H N D           | L E D V G R D S             | Y H H T                                             | F F E M L G N W S F G | D  | -- | V. polyspora 1     |
| 54 | S S D F       | F Y T L K R A Y N S Q K C   | I R A G                 | G K H N D           | L E D V G R D S             | Y H H T                                             | F F E M L G N W S F G | D  | -- | K. lactis          |
| 54 | T S K L Y D L | L K R A Y N S Q K C         | I R A G                 | G K H N D           | L E D V G K D S             | Y H H T                                             | F F E M L G N W S F G | D  | -- | V. polyspora 2     |
| 54 | A S D F       | A S L K R A A N S Q K C     | I R A G                 | G K H N D           | L E D V G R D S             | Y H H T                                             | F F E M L G N W S F G | D  | -- | C. albicans        |
| 55 | S S P L S     | K L N R A A N S Q K C       | I R A G                 | G K H N D           | L D D V G R D S             | Y H H T                                             | F F E M L G N W S F G | D  | -- | Y. lipolytica      |
| 54 | S S D F       | A K L K R A C D S Q K C     | I R A G                 | G K H N D           | L E D V G K D N             | Y H H T                                             | M F E M L G N W S F G | D  | -- | S. pombe           |
| 54 | N S E M S     | K W V R V A A N T Q K C     | I R A G                 | G K H N D           | L D D V G K D V             | Y H H T                                             | F F E M L G N W S F G | D  | -- | D. melanogaster 1  |
| 54 | S H P M A     | K L S R A A N T Q K C       | I R A G                 | G K H N D           | L D D V G K D V             | Y H H T                                             | F F E M L G N W S F G | D  | -- | H. sapiens 1       |
| 54 | N T E L S     | K L S R A C N T Q K C       | I R A G                 | G K H N D           | L D D V G K D T             | Y H H T                                             | F F E M L G N W S F G | D  | -- | A. thaliana        |
| 55 | P --          | --                          | H K R V V N S Q K C     | V R V G G K H N D   | L S V V G T D G             | Y H H T                                             | F F E M L G N W S F G | D  | -- | D. melanogaster 2  |
| 58 | R S E M A     | G F R R V V A N S Q K C     | V R A G G K H N D       | L S V V G R D S     | Y H H T                     | F F E M L G N W A F G G E                           | --                    | -- | -- | H. sapiens 2       |
| 52 | --            | T P A H P R A A S S Q K C   | V R A G G K H N D       | L D N V G Y T A R   | H H T F F E M L G N F S F G | D                                                   | --                    | -- | -- | C. crescentus      |
| 52 | --            | K R N Y S R A I T T S Q R C | V R A G G K H N D       | L E N V G Y T A R   | H H T F F E M L G N F S F G | D                                                   | --                    | -- | -- | E. coli            |
| 51 | --            | V P E N P R I V M A Q K E A | I R T N --              | D I E N V G K T A R | H H T F F E M L G N F S I G | D                                                   | --                    | -- | -- | B. subtilis        |
| 54 | F G --        | G R E W R R V T T C Q K E C | L R V G C --            | D I E N V G R T S R | H M T Y F E M L G N F S F G | D                                                   | --                    | -- | -- | T. thermophilus    |
| 53 | K --          | --                          | P K A N P L V I A Q P C | I R L N --          | D I D N V G R T G R         | H L T C F T M G G H H A F N R E                     | --                    | -- | -- | M. jannaschii      |
| 52 | K --          | --                          | P P A N P L V I A Q P S | I R L N --          | D V D N V G R T G R         | H L T C F T M G G H H A F N S E                     | --                    | -- | -- | M. thermotrophicus |
| 53 | P --          | --                          | P P A N P L T I S Q P C | I R L D --          | D L D S V G R T G R         | H L T L F E M M A H H A F N Y P                     | --                    | -- | -- | A. fulgidus        |
| 58 | E --          | --                          | P P A N P L I Q P Q L C | L R F N --          | D L D S I G L S G R         | H Y S G F T M L G I Q V F N T S                     | --                    | -- | -- | G. lamblia         |
| 54 | E --          | --                          | P P A N P L C A C Q F C | L R F N --          | D L D N I G I T G R         | H Y S G F N M L G I Q V F N H A D R A R K E P N Q F | --                    | -- | -- | T. vaginalis       |

|     |                                           |                                     |                                       |                                       |                     |                                 |           |                   |                    |
|-----|-------------------------------------------|-------------------------------------|---------------------------------------|---------------------------------------|---------------------|---------------------------------|-----------|-------------------|--------------------|
| 103 | --                                        | Y F K K E A I T Y S W T L L L T     | --                                    | E V Y G I P K D                       | --                  | R L Y V T Y F E G D E K L       | G L E P D | T E A R E L W K N | S. cerevisiae      |
| 103 | --                                        | Y F K K E A I D Y A W K L L L T     | --                                    | E V Y G I P A D                       | --                  | R L Y V T Y F E G D A K Q       | G L E P D | T E A L D L W K K | C. glabrata        |
| 100 | --                                        | Y F K K E A V E Y S W E L L L T     | --                                    | Q V Y S I P A D                       | --                  | R L Y V T Y F E G D E K Q       | G L E P D | H E A R E L W R S | V. polyspora 1     |
| 103 | --                                        | Y F K K E A I E Y S W E L L L T     | --                                    | K V Y G I P G D                       | --                  | R L Y V T Y F E G D E K L       | G L E P D | F E A R D L W K S | K. lactis          |
| 103 | --                                        | Y F K N D A I D Y S W D L L L T     | --                                    | N V Y K I P K D                       | --                  | R L Y V S Y F E G D E S Q       | G L E P D | F E A R D I W R S | V. polyspora 2     |
| 103 | --                                        | Y F K K E A I D Y S W E L L L T     | --                                    | K V Y G L Q E D                       | --                  | R L Y V T Y F G G D E K Q       | G L E P D | L E A K N F W L K | C. albicans        |
| 104 | --                                        | Y F K A E A C A W A W E L L L T     | --                                    | Q V Y G L D A D                       | --                  | R L Y V S Y F F G D D K L       | G L Q P D | L E A K Q I W M D | Y. lipolytica      |
| 103 | --                                        | Y F K K E A I A M A W D L L L T     | --                                    | N V Y G L K K D                       | --                  | Q L Y V T Y F G G H E E S       | G L E P D | L E A R Q L W L D | S. pombe           |
| 103 | --                                        | Y F K K E I C S W A W E F L T       | --                                    | Q R L A L P K D                       | --                  | R L Y V T Y F G G D A A S       | G L E P D | L E C K Q M W L D | D. melanogaster 1  |
| 103 | --                                        | Y F K E L A C K M A L E L L L T     | --                                    | Q E F G I P I E                       | --                  | R L Y V T Y F G G D E A A       | G L E A D | L E C K Q I W Q N | H. sapiens 1       |
| 103 | --                                        | Y F K K E A I E W A W E L L L T     | --                                    | K V Y G L P T D                       | --                  | R I Y A T Y F G R D E K A       | G L Q P D | N E A R D I W L K | A. thaliana        |
| 99  | --                                        | Y F K R E A C A M A W E L L L T     | --                                    | G P Y N I D P E                       | --                  | R L Y V T Y F A G K V L G       | I P A D   | L E C F E I W R S | D. melanogaster 2  |
| 108 | --                                        | Y F K E E A C N M A W E L L T       | --                                    | Q V Y G I P E E                       | --                  | R L W I S Y F D G D P K A G L D | P P D     | L E T R D I W L S | H. sapiens 2       |
| 98  | --                                        | Y F K E Q A I L H A W T L L L T     | A E --                                | F K L P K D                           | --                  | K L L V T V Y H T D             | D --      | E A A D L W K K   | C. crescentus      |
| 98  | --                                        | Y F K H D A I Q F A W E L L L T     | S E K W F A L P K E                   | --                                    | R L W V T V Y E S D | D --                            | --        | E A Y E I W E K   | E. coli            |
| 94  | --                                        | Y F K E E A I T W A W E F L T       | S D K W I G F D K E                   | --                                    | L S V T V H P E D E | --                              | --        | E A Y E F W A K   | B. subtilis        |
| 98  | --                                        | Y F K K E A I L W A W E F L T       | --                                    | E H L K L D P G                       | --                  | R L W V T V F E D D             | --        | E A Y E I W R D   | T. thermophilus    |
| 96  | --                                        | D D F K Y W Q E E T V L C F N F F   | --                                    | K K L G I D E K S I T F I E S W W E   | G G G N A G         | --                              | --        | P C Y E V I T H   | M. jannaschii      |
| 95  | --                                        | D N T V Y W E E E T I K Y C H D F L | --                                    | T H I G I D P S E I T F I E S W W Q   | G G G N E G         | --                              | --        | P C Y E V C V R   | M. thermotrophicus |
| 96  | --                                        | G K E I Y W K N E T V A Y C T E L L | --                                    | N E L G V K K E D I T Y K E E P W A G | G G N A G           | --                              | --        | P C L E A I V G   | A. fulgidus        |
| 101 | --                                        | T K Y V Y F K E E I I R F N L E W L | --                                    | Q T M G I D L D E V T L I A D V W A G | G G N L G           | --                              | --        | P C V E Y F M H   | G. lamblia         |
| 107 | G E T E E I F W K D T L I A N N Y R W C T | --                                  | E T L H L D P K K L T F I E D V W A G | G G N C G                             | --                  | --                              | --        | A C V E Y F Y G   | T. vaginalis       |

153 V G - V P D D H I L P G N - - - - - A K D N F W E M G - - - - - D Q G P C G P C S E I H Y D R - - - I G G - R N A A *S. cerevisiae*  
 153 V G - V P D D H I L P G N - - - - - A K D N F W E M G - - - - - E Q G P C G P C S E I H Y D R - - - I G G - R N A A *C. glabrata*  
 150 V G - V P D D H I L P G N - - - - - A K D N F W E M G - - - - - E Q G P C G P C S E I H Y D R - - - I G G - R N A A *V. polyspora 1*  
 153 V G - V K D D H I L P G N - - - - - A K D N F W E M G - - - - - E Q G P C G P C S E V H Y D R - - - I G G - R N A A *K. lactis*  
 153 V G - V P D D H I V P G N - - - - - L K D N F W E M G - - - - - E E G P C G P C S E I H Y D R - - - I G G - R N A S *V. polyspora 2*  
 153 V G - V P E D H I L P G S - - - - - V E D N F W E M G - - - - - D Q G P C G P C S E I H Y D R - - - I G G - R N A S *C. albicans*  
 154 L G - W A E D H I L P G D - - - - - S A D N F W E M G - - - - - D Q G P C G P C S E I H Y D R - - - I G G G R N A R *Y. lipolytica*  
 153 I G - I D E S R V I P G S - - - - - L K D N F W E M G - - - - - D Q G P C G P C S E I H Y D R - - - I G N - R T V P *S. pombe*  
 149 L G - F P A S R I L P F G - - - - - M K D N F W E M G - - - - - E T G P C G P C S E L H F D R - - - I G G - R S V P *D. melanogaster 1*  
 153 L G - L D D T K I L P G N - - - - - M K D N F W E M G - - - - - D T G P C G P C S E I H Y D R - - - I G G - R D A A *H. sapiens 1*  
 153 V - - L P S G R V L P F G - - - - - C K D N F W E M G - - - - - D T G P C G P C T E I H Y D R - - - I G N - R D A A *A. thaliana*  
 149 L G - F P A S R I L P F G - - - - - C A D N F W E M G - - - - - A T G P C G P C T E I H Y D R H R P D L G S V E Q R A *D. melanogaster 2*  
 158 L G - V P A S R V L S F G - - - - - P Q E N F W E M G - - - - - D T G P C G P C T E I H Y D L - - - A G G - - - - *H. sapiens 2*  
 140 I A G L G D R I I R I P - - - - - T S D N F W S M G - - - - - D T G P C G P C S E I F F D H G P H I A G G P P G S *C. crescentus*  
 142 E V G I P R E I R I R I G D N K G A P Y A S D N F W Q M G - - - - - D T G P C G P C T E I F Y D H G D H I M G G P P G S *E. coli*  
 138 K I G I P E E R I I R L E - - - - - G - - N F W D I G - - - - - E G P S G P N T E I F Y D R G E A Y G N D P E D P *B. subtilis*  
 140 L V G V P E E R I G R F G - - - - - E D E N Y W P G G A I T H G P N G P S G P C S E I F Y D R G P A Y G - T P D E T *T. thermophilus*  
 146 G V E L A T L V F M Q Y E K V - - - - - G D M - - - - - Y K E I P L K I V D T G - - Y G - - I E R F *M. jannaschii*  
 145 G V E L A T L V F I Q Y R T L - - - - - P D G - - - - - G R E E I P L K I V D T G - - Y G - - L E R F *M. thermautotrophicus*  
 146 G L E V A T L V F M N L E E H - - - - - P E G D I E I K - - - - - G A R Y R K M D N Y I V D T G - - Y G - - L E R F *A. fulgidus*  
 151 G L E V G N M V F M E F K A F - - - - - A D G - - - - - T I E P L P V Q V V D V G - - I G - - L E R I *G. lamblia*  
 160 G L E I G N M V F T E Y T V S - - - - - P Q G - - - - - E F S P I S T K V V D V G - - I G - - L E R I *T. vaginalis*

196 S L - V N M D D D P D V L E V W N L V F I Q F N R E Q D - - - - - G S L K S L P A K H I D T G M G F E R L V S V L Q D V R S *S. cerevisiae*  
 196 S L - V N M Q D D P D V L E V W N L V F M Q F N R E Q D - - - - - G S L K S L P A K H I D T G M G F E R L V S V L Q D V R S *C. glabrata*  
 193 H L - V N M Q D D P D V L E V W N L V F M Q Y N R E Q D - - - - - R S L K S L P A K H I D T G M G F E R L V S V L Q D V R S *V. polyspora 1*  
 196 H L - V N M Q D D P D V L E I W N M V F I Q F N R E Q D - - - - - R S L R A L P A K H V D T G M G F E R L V S V L H D V R S *K. lactis*  
 196 Q L - V N M K D D P D V L E I W N L V F I Q F N R D S E - - - - - R K L K A L P A K H V D T G M G F E R L V S V L Q D N V M S *V. polyspora 2*  
 196 A L - V N M H D D P N V L E V W N V V F I Q Y N R E A D - - - - - G N L R T L P N K H I D T G M G F E R L V S I L Q M K Y S *C. albicans*  
 198 D L - V N M D D P N V L E I W N I V F I Q Y N R E A D - - - - - K S L K P L P A K H I D T G M G F E R L V S V L Q D K S S *Y. lipolytica*  
 196 E L - V N M D D P N V L E I W N L V F I Q F N R E K D - - - - - G S L R L P L N R H V D T G M G F E R L V S V I Q N K T S *S. pombe*  
 196 E L - V N M D D P D V L E I W N L V F I Q Y N R E S D - - - - - G S L K Q L P K K H I D C G M G F E R L V S V I Q N K R S *D. melanogaster 1*  
 196 H L - V N M Q D D P N V L E I W N L V F I Q Y N R E A D - - - - - G I L K P L P K K S I D T G M G L E R L V S V L Q N K M S *H. sapiens 1*  
 195 S L - V N M D D P N T C L E I W N L V F I Q F N R E S D - - - - - G S L K P L P A K H V D T G M G F E R L T S V L Q N K M S *A. thaliana*  
 196 K L - V N A G R S D L T E L W N L V F I Q Y N R H A D - - - - - G S I S Q L P A H H V D T G M G F E R L T A V L Q N K M S *D. melanogaster 2*  
 197 - - - V G - - A P Q L V E L W N L V F M Q H N R E A D - - - - - G S L Q L P Q R H V D T G M G L E R L V A V L Q G K H S *H. sapiens 2*  
 188 - - - P D E D G D R F I E I W N L V F M Q F E Q L A G - - - - - G E R I S L P K P S I D T G M G L E R I A A V L Q G Q H D *C. crescentus*  
 197 - - - P E E D G D R Y I E I W N I V F M Q F N R Q A D - - - - - G T M E P L P K P S V D T G M G L E R I A A V L Q H V N S *E. coli*  
 183 E L Y P G G E N D R Y L E V W N L V F S E F N H N - - - P D - G T Y T P L P K K N I D T G M G L E R M V S V I Q N V P T *B. subtilis*  
 192 G P N T G S - G D R F V E I W N L V F T Q Y D R Q G P I P G P G I L K P L P Q K N I D T G M G L Y R V A A I L Q D V E D *T. thermophilus*  
 182 V W A S T G E P T I Y D A I F K N I V N K L K E D A G - - - - - V K D - - - - I D K E I L A K I T E V A G L M D V K D V *M. jannaschii*  
 182 A W I S Q G T P T A Y D A C L G P V I E K L V E L T G - - - - - V K - - - - I D E E I L A E N A Q V A G M M D I E T Y *M. thermautotrophicus*  
 190 V W A S K G T P T Y D A I F P E V V D T I I D N S N - - - - - V S F N R E D E R V R R I V A E S S K L A G I M G E L R G *A. fulgidus*  
 188 P W L L M R S V T S Y I T A F P T A L K Q M S Q L I G - - - - - I T D - - - - D V I N G D V W R R F G R Y S C L M N I D E V *G. lamblia*  
 197 P W L V N G G W T S Y L D V F D Y I L P V L S Q K L D - - - - - V P - - - - I D T P E F R K F A P N T A L F D A D E N *T. vaginalis*

251 N Y D T D V F T P L F E R I Q E I T S V R P Y S G N F G E N - D K D G I D T A Y R - - - V L A D H V R T L T F A L A D G G *S. cerevisiae*  
 251 N Y D T D V F M P L F A R I Q E I T G A R P Y S A G K F G D E - D K D N I D T T Y R - - - V L A D H V R T L V F A L A D G G *C. glabrata*  
 248 N Y D T D V F Q P L F K A I Q E I A N V R P Y T A G K F G G A E - D V D G I D T A Y R - - - V L A D H V R T L T F A L A D G G *V. polyspora 1*  
 251 N Y D T D V F E P L F N R I Q E I T G V R S Y T G K F G G A E - D T D G I D T A Y R - - - V L A D H V R T L T F A L A D G G *K. lactis*  
 251 N Y D I D L F T K I F K R I Q A I T N A R E Y T G K F G G K Y - - - D V D G V D T A Y R - - - V L A D H A R T L T F A L T D G G *V. polyspora 2*  
 251 N Y D T D V F L P I F D K I R E I T G V R P Y T G K F G G N E - D K D G I D T A Y R - - - V I A D H V R T L T F A I C D G G *C. albicans*  
 253 N Y D T D V F T P I F A K I Q E I T G A R D Y A G K F G G A E - D A D G I D T A Y R - - - V V A D H V R T L T F A L A D G G *Y. lipolytica*  
 251 N Y D T D V F S P I F A K I Q E L T N A R P Y T G K M G D E - D V D G I D T A Y R - - - V V A D H V R T L T F A I S D G G *S. pombe*  
 251 N Y D T D L F V P L F D A I Q A G T G A P P Y Q G R V G A D - D V D G I D M A Y R - - - V L A D H A R T I T I A L A D G G *D. melanogaster 1*  
 251 N Y D T D L F V P Y F E A I Q K G T G A R P Y T G K F G G A E - D A D G I D M A Y R - - - V L A D H A R T I T V A L A D G G *H. sapiens 1*  
 250 N Y D T D V F M P I F E D I Q K A T G A R P Y S G K V G G P E - D V D R V D M A Y R - - - V V A D H I R T L S F A I A D G S *A. thaliana*  
 251 N Y D T D L F T P I F D G I Q Q A A K T P V Y S G S F P D G G N A A V L D T S Y R - - - I L A D H A R M V T A C L A D G M *D. melanogaster 2*  
 248 T Y D T D L F S P L L N A I Q Q G C R A P P Y L G R V G V A - D E G R T D T A Y R - - - V V A D H I R T L S V C I S D G V *H. sapiens 2*  
 241 N Y D I D L F K A L I A A S V E L T G V - - - K - - - - - A E G A Q A P S H R - - - V I A D H L R S S S F L L A D G V *C. crescentus*  
 250 N Y D I D L F R T L I Q A V A K V T G - - - - - - - - - - A T D L S N K S L R - - - V I A D H I R S C A F L I A D G V *E. coli*  
 239 N F D T D L F V P I I K A T E S T S G E - T Y G - - - - - K D N V K D T A F K - - - V I A D H I R T V A F A V S D G A *B. subtilis*  
 251 F Y R T D T F F P I I Q E V A R M S G R - P Y - - - - - E G K T S V S H R - - - V I A D H V R A V V A A L S D G A *T. thermophilus*  
 233 G D L R K L R E E V A N K V I P V E E L D K - - - - - L I S P Y E D I Y - - - A I V D H T R A L A F M L G D G I *M. jannaschii*  
 232 A D L R E L R K R V A D K L G I S V E E L E R - - - - - A A A P M E S V Y - - - A I A D H T R C L A F M L A D G V *M. thermautotrophicus*  
 246 E R L N Q L R K S V A D E T V G V S E E L E G - - - - - I V V P L E K V Y - - - S L A D H T R C I L F M L G D G L *A. fulgidus*  
 241 S D I S Q A W A L I K E R T G L T E E D I T N - - - - - V I E P V R Q M Y - - - I V L D H L R S L M V A I Q D G A *G. lamblia*  
 247 Q H I E Q T W A K V G E E M G L D K A G L A K - - - - - F R Q H L R Q F S D L V R I C D H T R T V L Y A I E D G A *T. vaginalis*

308 V P N M N E G R G Y V L R R I L R R R G A R Y A R K K Y M N Y P I G N - - - F F S T L A P T L I S Q V Q D I F P - - E L A K D P *S. cerevisiae*  
308 V P N M N E G R G Y V L R R I L R R R G A R F A R K K Y M N Y P I G N - - - F F S S L A P T L I D Q V K H I F P - - E V A K D P P *C. glabrata*  
305 V P N M N E G R G Y V L R R I L R R R G A R Y A R K K Y M N Y P I G N - - - F F S R L A P T L I E Q V K D M F P - - E V A K D P *V. polyspora 1*  
308 V P N M N E G R G Y V L R R I L R R R G A R Y A R K K Y M N Y P I G N - - - F F S Q L S V T L I E Q V K D M F P - - E V A R S K D P *K. lactis*  
308 I P N M N E G R G Y V I R R I L R R R G A R Y A R K K Y M N Y S I G D - - - F F S K L I P Q V I E N K S I F P - - E V A R S K D P *V. polyspora 2*  
308 V P N M N E G R G Y V L R R I L R R R G A R Y V R K K Y M N Y P I G S - - - F F Q Q L V D V I E Q N K E I F P - - E I S S G A *C. albicans*  
310 V P N M D G R G Y V L R R I L R R R G A R F V R K K F D V P I G S - - - F F S Q L A P T L I E Q V N E I F P - - E L S K R T *Y. lipolytica*  
308 V P N M N E G R G Y V L R R I L R R R G A R Y V R K K F G V P I G N - - - F F S R L S L T V V E Q M G D F P - - E L K R K V *S. pombe*  
308 T P D N T G R G Y V L R R I L R R A V R Y A T E K L N A K P G - - - F F A T L V N T V V D L L G D A F P - - E V K K D P *D. melanogaster 1*  
308 R P D N T G R G Y V L R R I L R R A V R Y A H E K L N A S R G - - - F F A T L V D V V V Q S L G D A F P - - E L K K D P *H. sapiens 1*  
307 R P G N E G R E Y V L R R I L R R A V R Y G K E I L K A E E G - - - F F N G L V S S V I R V M G D V F T - - E L K E H E *A. thaliana*  
309 L P D Q N Q K - - - L R R V L R K A L N I S E H V F A H D K - - - L L T Q L V P I V V E T L G E A Y P - - E M A A K Q *D. melanogaster 2*  
305 F P G M S G P P L V L R R I L R R A V R F S M E I L K A P P G - - - F L G S L V P V V V E T L G D A Y P - - E L Q R N S *H. sapiens 2*  
289 S P S N E G R G Y V L R R I L R R R A M R H A Y L L G A S E P - - - L M H R L A P T L V R E M G Q A Y P - - E L R R A E *C. crescentus*  
296 M P S N E N R G Y V L R R I L R R A V R H G N M L G A K E T - - - F F Y K L V G P L I D V M G S A G E - - D L K R Q Q *E. coli*  
289 L P S N E G R G Y V L R R I L R R A V R Y A K T I N I H R P - - - F M F L V P V V A E I M A D F Y P - - E V K E K A *B. subtilis*  
289 T F S M T G R G Y V I R R I L R R A L R H G Y L L G L S D P - - - F L H R L A P L V A E I L G D F Y P - - E M R E N L *T. thermophilus*  
282 V P S M V K D G Y L V R M L I R K T L R H M D R L N L S - - - T P I T E I V A M Q L N E L K D L Y P - - E I L D M E *M. jannaschii*  
281 I P S M V K E G Y L A R L I I R R T L R L M K D L G M K - - - E S L K D I M N I Q V E F L E G H Y P - - E I R S H H *M. thermotrophicus*  
295 V P S N A G A G Y L A R L M I R R L L A E E L G L G - - - L D L Y D L V E H H K K I L G - - F - - F D V P P *A. fulgidus*  
290 L P S N V G G G N N L R N V L R R V F H I L V S R G W W D A I G G I D G L C Q I I D Y H R Q D L E E V H G A G S P P P *G. lamblia*  
299 L P S N V G G G A A N I R D I L R I V F D I I K K H N W L G K I G G V D G I I D V F K A H M K G L E G F F G P - - F S N T *T. vaginalis*

364 A F L F E I L D E E E A S F A K T L D R G E R I L F E K Y - - - - - - - - - - - - - - - - A S A A S K T *S. cerevisiae*  
364 S F L F E I L D E E E A S F S K T L D R G E R I F E K Y - - - - - - - - - - - - - - - - A A A A S Q T *C. glabrata*  
361 S F V A E I L D E E E A S F S K T L D R G E K L F E K Y - - - - - - - - - - - - - - - - A A A A S Q T *V. polyspora 1*  
364 S Y L F E I L D E E E A S F A K T L D R G E K L F E K Y - - - - - - - - - - - - - - - - A E D A L K K *K. lactis*  
364 N Y I K E I L D E E E A S F A K T L D R G E K L F E K Y - - - - - - - - - - - - - - - - A S D A S K L *V. polyspora 2*  
364 Q D L K E I L N D E E E A S F A K T L D R G E K L F E Q Y - - - - - - - - - - - - - - - - A I I A S K T *C. albicans*  
366 E D I F E I L N D E E E S F S R T L D R G E K L F E Q Y - - - - - - - - - - - - - - - - A A D A K A N *Y. lipolytica*  
364 D D V R E L L D E E E E S F S R T L D R G E K M F E Q Y - - - - - - - - - - - - - - - - A A A A K K T *S. pombe*  
363 Q H I I D I I N E E E E L Q F L K T L T R G R N I L N R - - - - - - - - - - - - - - - - T I E K L G *D. melanogaster 1*  
363 D M Y K D I I N E E E E V Q F L K T L S R G R R I L D R - - - - - - - - - - - - - - - - K I Q S L G *H. sapiens 1*  
362 K K I I T D I I K E E E A S F C K T L A K G - - - I E K F - - - - - - - - - - - - - - - - R K A G Q A V *A. thaliana*  
360 Q A V I D L I C H E Q E V Y K N L R E S S S K A F A E V L M E F P N L D D I D L M E C P G F V P A Y R E L Q M Q R C K F *D. melanogaster 2*  
360 A Q I A N L V S E D E A A F L A S L E R G R R I I D R - - - - - - - - - - - - - - - - T L R T L G *H. sapiens 2*  
343 A L I V E T L R Q E E E R F R T T L G R G M L L D E A - - - - - - - - - - - - - - - - T A N L A A G *C. crescentus*  
350 A Q V E Q V L K T E E E Q F A R T T L E R G L A L L D E E - - - - - - - - - - - - - - - - L A K L S G - *E. coli*  
343 D F I A K V I K T E E E R F H E T L N E G L A I L S E M - - - - - - - - - - - - - - - - I K K E K D K - *B. subtilis*  
353 P A V E K Q I R L E E E R F L E T L E G G L K R L D A L - - - - - - - - - - - - - - - - L S G L K P - *T. thermophilus*  
335 D Y I M E I L E I E T N K Y R Q T I E R G K G I V E R L L K - - - - - - - - - - - - - - - - - - - - *M. jannaschii*  
334 H I L N I I D L E E H R Y A R T V K R G R R I V E K T I K Y - - - - - - - - - - - - - - - - L K R D *M. thermotrophicus*  
345 S T V Q E I L E L E K E R Y R T T V S K G T R L V E R L V E - - - - - - - - - - - - - - - - - - - - *A. fulgidus*  
350 K P L R A V L E L E Y T R W T T T D K D A R D K V E K L L K - - - - - - - - - - - - - - - - K G *G. lamblia*  
357 R C L E D V I R L E F T R W E N S H A N A I K L L K S F V N - - - - - - - - - - - - - - - - K W *T. vaginalis*

399 E S K T L D G K Q V W R L - - - Y D T Y G F P V D L T E L M A E E Q G L K I D G P G F E K A K Q E S Y E A S K R G G - - K *S. cerevisiae*  
399 E S K T L D G K Q V W R L - - - Y D T Y G F P V D L T E L M A E E Q N L K I D G P G F E K A K Q E S Y E A S K R G G - - Q *C. glabrata*  
396 E S K T L D G K Q V W R L - - - Y D T Y G F P V D L T E L M A E E Q G L K I D G P G F E K A K Q E S Y E A S K R G G - - K *V. polyspora 1*  
399 A D K T L D G K Q V W R L - - - Y D T Y G F P V D L T E L M A E E Q G L K I D T I G F E K A K Q E S Y E A S K K G G - - K *K. lactis*  
399 D S K T L D G L Q V W R L - - - Y D T Y G F P V D L T E L M A Q E L G L N I D V P G F E R A K K D S Y E A S K R A S - - K *V. polyspora 2*  
399 P E Q T L S G K D V W R L - - - Y D T Y G F P V D L T R L M A E E A G L K I D E E G F E R A K E S R E A S K G S G - - T *C. albicans*  
401 S K T V L A G K D V W R L - - - Y D T Y G F P V D L T R I M A E E A G L D I D E E A A F D K A K Q E S L E A S K G G K K - T *Y. lipolytica*  
399 P S K T L Q G M D V W R L - - - Y E T Y G F P V D L T H L M A E E A G I K I D E P G F E A A Q A R S K E I S K Q A S K G G *S. pombe*  
396 N Q T I P G D V A W R L - - - Y D T Y G F P V D L T Q L M A E E K S L K I D M D G Y E A A K H N S Y V L S Q G K G - - - *D. melanogaster 1*  
396 D S K T I P G D T A M L L - - - Y D T Y G F P V D L T G L I A E E K G L V V D M D G F E E E R K L A Q L K S Q G K G - - - *H. sapiens 1*  
394 Q G N T L S G D D A F I L - - - W D T Y G F P L D L T Q L M A E E R G L L V D V D G F N K A M E E A R E R S R S A Q - - N *A. thaliana*  
420 S N N T I P G D F L Y K L - - - T D T Y G L T E E S F L K L A E L E N M N C D L E R Y R A E V S L A K L K A K G Q R E T *D. melanogaster 2*  
393 P S D M F P A E V A M S L S L C G D L G L P L D M V E L M L E E K G V Q L D S A G L E R L A Q E E A Q H R A R Q A - - E *H. sapiens 2*  
378 - - G V L D G E T A F K L - - - Y D T Y G F P L D L T Q D A V R A K G L T V D T D A F D A A M Q K Q R E M A R A N W - - - *C. crescentus*  
384 - - D T L D G E T A F R L - - - Y D T Y G F P V D L T A D V C R E R N I K V D E A G F E A A M E Q Q R R R A R E - - - *E. coli*  
378 G S S V I S G A D V F K L - - - Y D T Y G F P V E L T E E Y A E D E N M T V D H E G F E E E M N Q R R E A R A N A R - - - *B. subtilis*  
387 - - G E V L P G K E A F R L - - - Y D T Y G F P L D L T V E I A A E R G Y G V D T E G F Q K A M E E Q Q S R S R A A M - - - *T. thermophilus*  
365 S K K E I D L E N L I E L - - - Y D S H G I P P E I V K D V A A K S L - - - G K D V K I P D N F Y T I V A E R H E N E K K - - - *M. jannaschii*  
369 G K A E M P L E I L I K L - - - Y D S H G I P P E T I G E I A E E S - - - G F Q V K I P D N F Y T L V A E R H E T E T - - - *M. thermotrophicus*  
375 R K K K L E K D D L I E L - - - Y D S H G I P V E L A V G I A A E K - - - G A E V E M P K D I Y A E L A K R H S K A E - - - *A. fulgidus*  
382 K G - H L S I E D W V T I - - - V T T F G L N A D Q V S E L T G I P - - - - - V P E N L Y S H V A E Q Q E K N A - - - *G. lamblia*  
389 R G K E I P V Q E W I T Q - - - M T S N G V S A D E I I E A F Q V D D P N S Q L Q K P D D L Y I K L E E Y K C R T A - - - *T. vaginalis*

455 **K**D**Q** - - S **D**L**I**K**L**N**V**H**E**L**S**E**L**M - D A K V P K T M D E F K Y G  
455 **K**G**G** - - D **D**L**I**K**L**N**V**H**S**I**A**E**L**N - S E N V P K T D D S F K Y  
452 **K**D**N** - - S **D**L**L**K**L**N**V**H**E**L**S**Q**L**M - **E**E**K**I**A**K**S**D D S S K Y  
455 **K**G**A** - - S **D**L**I**R**L**M**V**H**E**L**S**Q**L**M - G D N V A K T D D S S K Y  
455 **K**Y**D** - - I **D**L**F**K**L**D**V**H**D**I**S**K**L**M - T D A V P K T M D K D K Y  
455 **K**D**G** - - K T L V K L D V H A L S E L D Q N D A I P K T M D E F K Y  
458 **A**G**G** - - V Q L V K L D V H A L A E L E K N D A V P K T D D Q A K F  
457 **S**S**G** - - D **D**L**L**V**L**D**V**H**A**L**G**A**L**S**K**M **D**D**I**P**E**T**D**D**V**F**K**H  
451 **A**S**K** - - I **E**E**I**N**L**D**V**H**A**I**S**Q**L**Q - **E**Q**G**V**P**P**T**M**D**T**F**K**Y**  
451 **A**G**G** - - E **D**L**I**M**L**D**I**Y**A**I**E**E**L**R - A R G L E V T D D S P K Y  
450 **K**Q**A** - - G G A I V M D A D A T S T L H - K A G V S A T D D S F K Y  
478 **A**G**G** S L C **D**L**A**T**E**Q**R**I**A**E**A**Q**A**M**L**T**K**R**L**T**P**T**D**N**S**H**K**Y  
451 **P**V**Q** - - K Q G L W L D V H A L G E L Q - R Q G V P P T D D S P K Y  
431 **A**G**S** - - - G Q Q G A A A A W F S I K E K A G A T - - D F V G Y  
435 - - - - - A S G F G A D Y N A M I R Y D S A S - - E F K G Y  
433 **Q**D**V** - - G S M Q V Q G G - **A**L**R**D**V**T**V**E**S** - - - - T F V G Y  
441 **A**F**E** - - R E I F **K**K**G**A**Q**V**L**E**L**Y**A**E**R**G**A**T - - E F L G Y  
418 - - - - - - E V K - E K I K - L P **E**V**N**V**D**K**T**E**L**L**F**Y  
422 - - - - - - - E M P - E E D - - V H L D Y P A T E L L F Y  
428 - - - - - - - K V Q - E K K I - T L Q N E Y P A T E K L Y Y  
429 - - - - - - - I K **V** - **A**V**A**Q**L**Y**D**T**V**S**L**P**P**T**D**C**V**Y**Y**  
444 - - - - - - - K G I - E L E K - Y N V E G I P D T E E I Y N Y P

*S. cerevisiae*  
*C. glabrata*  
*V. polyspora 1*  
*K. lactis*  
*V. polyspora 2*  
*C. albicans*  
*Y. lipolytica*  
*S. pombe*  
*D. melanogaster 1*  
*H. sapiens 1*  
*A. thaliana*  
*D. melanogaster 2*  
*H. sapiens 2*  
*C. crescentus*  
*E. coli*  
*B. subtilis*  
*T. thermophilus*  
*M. jannaschii*  
*M. thermotrophicus*  
*A. fulgidus*  
*G. lamblia*  
*T. vaginalis*
